# Supplementary material
Source: PubMed Central journal article supplement (PMC5312072)

# Supplementary Figure 1. CMS Rat Behavior Data

**A**

## Forced Swim Immobility

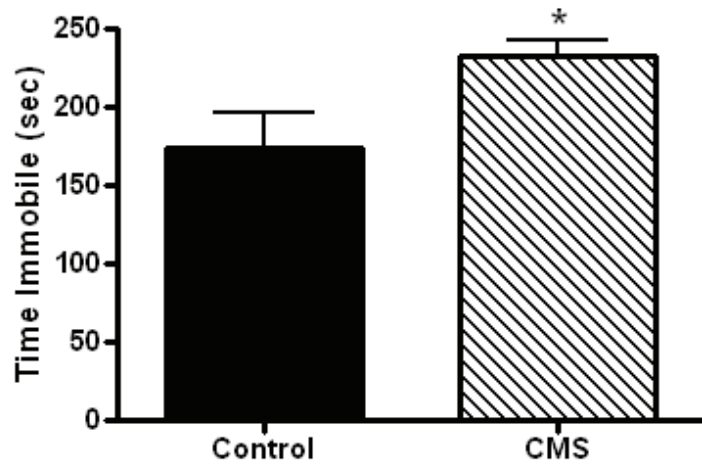

**B**

## Body Weight

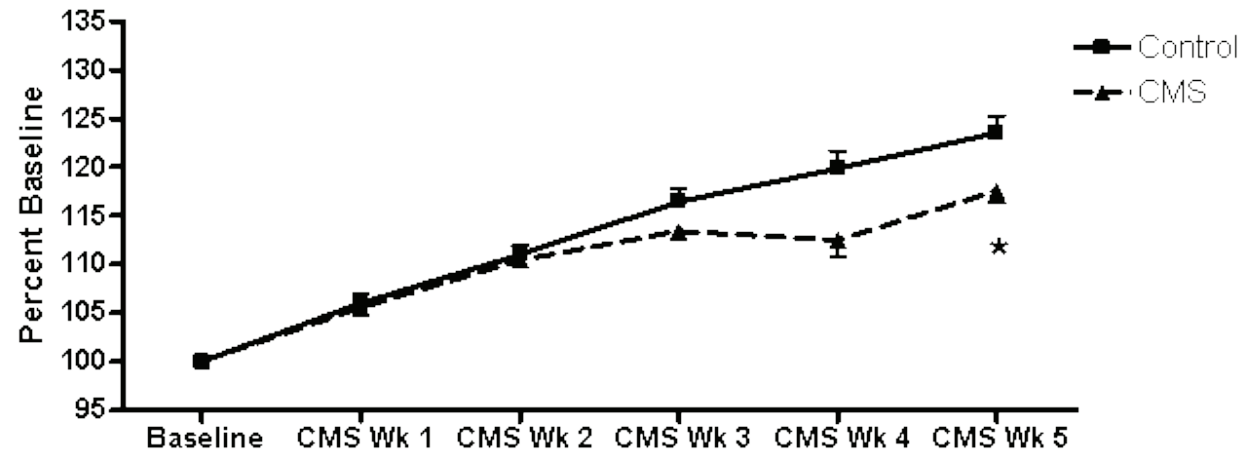

Supplement: npp2016249x1.pdf [file npp2016249x1.pdf]
